# Supplementary material
Source: PubMed Central journal article supplement (PMC4280849)
Supplement: NIHMS646037-supplement-Supplementary.pdf [file NIHMS646037-supplement-Supplementary.pdf]

## PGx Patient Pretest Survey

Please indicate your gender

- Male (1)
- Female (2)
- Prefer not to answer (3)

Please indicate your age group

- 18-29 years old (1)
- 30-39 years old (2)
- 40-49 years old (3)
- 50-59 years old (4)
- 60-69 years old (5)
- 70 years or older (6)
- Prefer not to answer (7)

Which category best describes your ethnicity?

- Hispanic or Latino (1)
- Not Hispanic or Latino (2)
- Unsure (3)
- Prefer not to answer (4)

Which category best describes your race (you may choose more than one)

- White (1)
- Black or African-American (2)
- American Indian or Alaskan Native (3)
- Asian (4)
- Native Hawaiian or Other Pacific Islander (5)
- Unsure (6)
- Prefer not to answer (7)

Please indicate the highest grade or level of school you have completed

- Less than 9th grade (1)
- 9-12th grade, no diploma (2)
- High school graduate or equivalent (GED) (3)
- Some college, no degree (4)
- Associate's degree (5)
- Bachelor's degree (6)
- Graduate or professional degree (7)
- Prefer not to answer (8)

DO you work in a health-care or science-related field?

- Yes (1)
- No (2)
- Prefer not to answer (3)

What kind of health insurance or health care coverage do you have? Include those that pay for only one type of service (such as nursing home care, accidents, or dental care). Exclude private plans that only provide extra cash while hospitalized. If you have more than one kind of health insurance, indicate all plans that you have.

- Private health insurance (1)
- Medicare (2)
- Medi-gap (3)
- Medicaid (4)
- SCHIP (5)
- Military health care (TRICARE/VA/CHAMP-VA) (6)
- Indian Health Service (7)
- State-sponsored health plan (8)
- Other government program (9)
- Single service plan (e.g. dental, vision, prescription) (10)
- No coverage of any type (11)
- Don't know (12)
- Prefer not to answer (13)

In general, would you say your health is...

- Excellent (1)
- Very Good (2)
- Good (3)
- Fair (4)
- Poor (5)

In the past year, have you been prescribed any medicine a health professional such as a doctor, physician assistant or dentist [do not include things like vitamins or supplements]

- Yes (1)
- No (2)
- Not sure (3)
- Prefer not to answer (4)

How many different prescription medicines do you regularly take/use? \_\_\_\_\_

*A "side effect" is a secondary problem or reaction caused by taking medicine.*

Have you ever had any type of side effect from a medicine that you have been prescribed?

- Yes (1)
- No (2)
- Don't know (3)

If Yes Is Not Selected, Then Skip To To your knowledge has any member of y...

Have you ever had a serious side effect from medicine that required immediate medical attention (such as heart failure or seizures)?

- Yes (1)
- No (2)
- Don't know (3)

The last time you experienced a side effect from a medicine, how much did that side effect bother you?

- Not at all bothered (1)
- Not very bothered (2)
- Somewhat bothered (3)
- Very bothered (4)
- Extremely bothered (5)

Have you ever stopped taking a prescription medicine because of the side effects?

- Yes (1)
- No (2)
- Don't know (3)

If Yes Is Not Selected, Then Skip To Have you ever stopped taking a prescr...

Was stopping taking the medicine of your own choice or based on a doctor's orders?

- Your own choice (1)
- Based on a doctor's orders (2)

Have you ever stopped taking a prescription medicine because it was not helping your condition?

- Yes (1)
- No (2)
- Don't know (3)

If Yes Is Not Selected, Then Skip To To your knowledge has any member of y...

Was stopping taking the medicine of your own choice or based on a doctor's orders?

- Your own choice (1)
- Based on a doctor's orders (2)

To your knowledge has any member of your immediate family (parents, children, siblings) ever had any side effects from a prescription medicine?

- Yes (1)
- No (2)
- Don't know (3)

Please tell how much you agree or disagree with the following statements.

|                                                                                            | Strongly disagree<br>(1) | Disagree<br>(2)       | Neither Agree nor Disagree<br>(3) | Agree<br>(4)          | Strongly Agree<br>(5) |
|--------------------------------------------------------------------------------------------|--------------------------|-----------------------|-----------------------------------|-----------------------|-----------------------|
| My health, at present, depends on my medicines (1)                                         | <input type="radio"/>    | <input type="radio"/> | <input type="radio"/>             | <input type="radio"/> | <input type="radio"/> |
| Having to take medicines worries me (2)                                                    | <input type="radio"/>    | <input type="radio"/> | <input type="radio"/>             | <input type="radio"/> | <input type="radio"/> |
| My life would be impossible without my medicines (3)                                       | <input type="radio"/>    | <input type="radio"/> | <input type="radio"/>             | <input type="radio"/> | <input type="radio"/> |
| Without my medicines, I would be very ill (4)                                              | <input type="radio"/>    | <input type="radio"/> | <input type="radio"/>             | <input type="radio"/> | <input type="radio"/> |
| I sometimes worry about the long-term effects of my medicines (5)                          | <input type="radio"/>    | <input type="radio"/> | <input type="radio"/>             | <input type="radio"/> | <input type="radio"/> |
| My medicines are a mystery to me (6)                                                       | <input type="radio"/>    | <input type="radio"/> | <input type="radio"/>             | <input type="radio"/> | <input type="radio"/> |
| My health and future will depend on my medicines (7)                                       | <input type="radio"/>    | <input type="radio"/> | <input type="radio"/>             | <input type="radio"/> | <input type="radio"/> |
| My medicines disrupt my life (8)                                                           | <input type="radio"/>    | <input type="radio"/> | <input type="radio"/>             | <input type="radio"/> | <input type="radio"/> |
| I sometimes worry about becoming too dependent on my medicines (9)                         | <input type="radio"/>    | <input type="radio"/> | <input type="radio"/>             | <input type="radio"/> | <input type="radio"/> |
| My medicines protect me from becoming worse (10)                                           | <input type="radio"/>    | <input type="radio"/> | <input type="radio"/>             | <input type="radio"/> | <input type="radio"/> |
| Doctors use too many medicines (11)                                                        | <input type="radio"/>    | <input type="radio"/> | <input type="radio"/>             | <input type="radio"/> | <input type="radio"/> |
| People who take medicines should stop their treatment for a while every now and again (12) | <input type="radio"/>    | <input type="radio"/> | <input type="radio"/>             | <input type="radio"/> | <input type="radio"/> |
| Most medicines are addictive (13)                                                          | <input type="radio"/>    | <input type="radio"/> | <input type="radio"/>             | <input type="radio"/> | <input type="radio"/> |
| Natural remedies are safer than medicines (14)                                             | <input type="radio"/>    | <input type="radio"/> | <input type="radio"/>             | <input type="radio"/> | <input type="radio"/> |
| Medicines do more harm than good (15)                                                      | <input type="radio"/>    | <input type="radio"/> | <input type="radio"/>             | <input type="radio"/> | <input type="radio"/> |
| All medicines are poisons (16)                                                             | <input type="radio"/>    | <input type="radio"/> | <input type="radio"/>             | <input type="radio"/> | <input type="radio"/> |
| Doctors place too much trust on medicines (17)                                             | <input type="radio"/>    | <input type="radio"/> | <input type="radio"/>             | <input type="radio"/> | <input type="radio"/> |
| If doctors had more time with patients they would prescribe fewer medicines (18)           | <input type="radio"/>    | <input type="radio"/> | <input type="radio"/>             | <input type="radio"/> | <input type="radio"/> |

Have you or anyone in your family ever had a genetic test to predict or diagnose a disease or condition?

- Yes (1)
- No (2)
- Don't know (3)

Have you or anyone in your family ever had a genetic test to predict how well a medicine may work for you or your risk for having a side effect?

- Yes (1)
- No (2)

How would you describe your understanding of how genetic testing can be used in healthcare? Would you say you understand it...

- Very well (1)
- Somewhat well (2)
- A little (3)
- Not at all (4)
- 

Your doctor mentioned a genetic test (called a phar-ma-co-genetic test). These tests are used to predict how well you may respond to a medicine or your risk for having a side effect. We are interested in understanding what factors are considered by patients in their decision whether or not to be tested.

What was your decision regarding having pharmacogenetic testing?

- I declined to have testing (1)
- I agreed to have testing (2)
- Prefer not to answer (3)

Please indicate which, if any, of the following factors you considered in your decision to be tested and the level of importance of that reason in your decision:

|                                                                                                                       | Major factor in my decision (1) | Minor factor in my decision (2) | Considered, but was not a factor in my decision (3) | Did not consider (4)  |
|-----------------------------------------------------------------------------------------------------------------------|---------------------------------|---------------------------------|-----------------------------------------------------|-----------------------|
| Concern about the privacy of my test result (1)                                                                       | <input type="radio"/>           | <input type="radio"/>           | <input type="radio"/>                               | <input type="radio"/> |
| Potential discrimination based on my test result (2)                                                                  | <input type="radio"/>           | <input type="radio"/>           | <input type="radio"/>                               | <input type="radio"/> |
| Helpfulness in optimizing my medicine treatment (3)                                                                   | <input type="radio"/>           | <input type="radio"/>           | <input type="radio"/>                               | <input type="radio"/> |
| Worry about the possibility of side effects or needing to get another medicine prescribed if this one didn't work (4) | <input type="radio"/>           | <input type="radio"/>           | <input type="radio"/>                               | <input type="radio"/> |
| Trust in test result (5)                                                                                              | <input type="radio"/>           | <input type="radio"/>           | <input type="radio"/>                               | <input type="radio"/> |
| Time to wait to learn of my test results (6)                                                                          | <input type="radio"/>           | <input type="radio"/>           | <input type="radio"/>                               | <input type="radio"/> |
| Providing a DNA sample for testing (7)                                                                                | <input type="radio"/>           | <input type="radio"/>           | <input type="radio"/>                               | <input type="radio"/> |
| Family history of side effects from medicines or not responding to medicines (8)                                      | <input type="radio"/>           | <input type="radio"/>           | <input type="radio"/>                               | <input type="radio"/> |
| Recommendations from your physician (9)                                                                               | <input type="radio"/>           | <input type="radio"/>           | <input type="radio"/>                               | <input type="radio"/> |
| Length of time you'll need to take the prescribed medicines (e.g. 1 week vs. indefinitely) (10)                       | <input type="radio"/>           | <input type="radio"/>           | <input type="radio"/>                               | <input type="radio"/> |
| Your familiarity (knowledge) of the medicine (11)                                                                     | <input type="radio"/>           | <input type="radio"/>           | <input type="radio"/>                               | <input type="radio"/> |
| Your understanding about how the test will help your doctor choose the best medicine for you (12)                     | <input type="radio"/>           | <input type="radio"/>           | <input type="radio"/>                               | <input type="radio"/> |
| Concern about being prescribed a more expensive medicine based on test results (13)                                   | <input type="radio"/>           | <input type="radio"/>           | <input type="radio"/>                               | <input type="radio"/> |
| Concern about having a genetic test ordered and reported by a non-genetics professional (14)                          | <input type="radio"/>           | <input type="radio"/>           | <input type="radio"/>                               | <input type="radio"/> |

## PGx Patient Follow-up Survey

Q28 About three months ago, your doctor ordered a pharmacogenetic test. This test looks for genetic changes that may affect how a medicine works in your body. You kindly completed a survey at the time the test was ordered. We would now like to get your opinions about your experience with the test and the medicine your doctor prescribed. Your responses will remain confidential and will not be shared with your physician. The survey should take about 10-15 minutes to complete and you will receive compensation. Please click through to the next pages to continue to the survey.

Did your doctor share your pharmacogenetic test results with you?

- Yes (1)
- No (2)
- Don't know/can't recall (3)
- Prefer not to answer (4)

If Yes Is Not Selected, Then Skip To Do you recall whether any changes wer...

How did your doctor report your results?

- Over the phone (by nurse or doctor) (1)
- In-person at a follow-up appointment scheduled specifically to review results (2)
- In-person at an appointment scheduled for another reason (3)
- In an email or letter sent by mail (4)
- Don't know/can't recall (5)
- Prefer not to answer (6)

What information did the physician include when discussing your pharmacogenetic test results?

|                                                                                                              | Yes; my doctor did discuss this (1) | No; my doctor did not discuss this (2) | Don't know/can't recall (3) | Prefer not to answer (4) |
|--------------------------------------------------------------------------------------------------------------|-------------------------------------|----------------------------------------|-----------------------------|--------------------------|
| Options for therapy based on the test results (1)                                                            | <input type="radio"/>               | <input type="radio"/>                  | <input type="radio"/>       | <input type="radio"/>    |
| Changes (or no changes) necessary for the medication based on results (2)                                    | <input type="radio"/>               | <input type="radio"/>                  | <input type="radio"/>       | <input type="radio"/>    |
| Relevance of test result for other medications you currently take or may be prescribed in the future (3)     | <input type="radio"/>               | <input type="radio"/>                  | <input type="radio"/>       | <input type="radio"/>    |
| The specific genetic results/gene changes (4)                                                                | <input type="radio"/>               | <input type="radio"/>                  | <input type="radio"/>       | <input type="radio"/>    |
| A description of what your genetic test results mean (for example, that you may break down drugs slowly) (5) | <input type="radio"/>               | <input type="radio"/>                  | <input type="radio"/>       | <input type="radio"/>    |

Was there anything else that your doctor discussed regarding the pharmacogenetic test that has not been mentioned? If so, please explain briefly

- No (1)
- Yes (2) \_\_\_\_\_
- Don't know/can't recall (3)
- Prefer not to answer (4)

How well do you feel you understand the test results?

- I understand the results very well (1)
- I somewhat understand the results (2)
- Unsure (3)
- I really did not understand the results (4)
- Prefer not to answer (5)

Do you recall whether any changes were made to your prescription based on the test results?

- I did not start on the prescribed medication until the test results were back (1)
- My doctor switched my prescription to a different medication (2)
- My doctor changed the dose of the prescribed medication (3)
- No changes were made to the prescribed medication (4)
- Don't know/can't recall (5)
- Prefer not to answer (6)

Did you have any questions about the test result that were not addressed by your doctor? If so, please described briefly.

- Yes (1) \_\_\_\_\_
- No (2)
- Prefer not to answer (3)

Were you satisfied with your decision to take the test?

- Extremely satisfied (1)
- Fairly satisfied (2)
- Uncertain (3)
- Rather dissatisfied (4)
- Extremely dissatisfied (5)
- Prefer not to answer (6)

Do you trust the test result?

- Trust completely (1)
- Trust hesitantly (2)
- Uncertain (3)
- Rather distrustful (4)
- Do not trust at all (5)
- Prefer not to answer (6)



How helpful do you think the testing was to your doctor's decision about your treatment

- Very helpful (1)
- Somewhat helpful (2)
- Neutral (3)
- Not very helpful (4)
- Not at all helpful (5)
- Prefer not to answer (6)

After having the test, did you feel more confident that the medication prescribed to you would not cause side effects and/or would help your condition, compared to past prescriptions you've received without testing?

- Yes, definitely felt more confident (1)
- Yes, somewhat felt more confident (2)
- Unsure/ No difference (3)
- No, did not really feel more confident (4)
- No, definitely did not feel more confident (5)
- Prefer not to answer (6)

How likely would you be to have another pharmaco-genetic test if recommended for other medications prescribed to you in the future?

- Very likely (1)
- Somewhat likely (2)
- Neutral (3)
- Somewhat unlikely (4)
- Very unlikely (5)
- Prefer not to answer (6)

Did you prefer providing a saliva sample for testing compared to a blood sample?

- Yes (1)
- No (2)
- Makes no difference either way (3)
- Don't know (4)
- Prefer not to answer (5)

*There are two options for how pharmacogenetic tests can be used. Option #1 - Individual tests are ordered as needed each time a new medication is prescribed (as was in your case). Option #2 - Ordering a complete pharmacogenetic profile (multiple tests at once), so that results are available whenever your doctor needs to prescribe a new medication.*

Do you have a preference between these two options for pharmacogenetic testing?

- Option # 1: Tests are ordered as needed for each prescribed medication (1)
- Option # 2: A complete pharmacogenetic profile is ordered (2)
- No preference (3)
- Unsure/don't know (4)
- Prefer not to answer (5)

After discussing your results with your doctor, did you look up any additional information about the medicine or the test result?

- Yes (1)
- No (2)
- Don't know/ can't recall (3)
- Prefer not to answer (4)

If Yes Is Not Selected, Then Skip To End of Block

When you looked up additional information, where did you go first?

- Books (1)
- Brochures, pamphlets etc (2)
- Disease organization (3)
- Family (4)
- Friend/co-worker (5)
- Pharmacist (6)
- A different doctor or healthcare provider than the one who ordered the test (7)
- Internet (8)
- Library (9)
- Magazines (10)
- Newspapers (11)
- Telephone information number (12)
- Complementary, alternative or unconventional practitioner (13)
- Other (14) \_\_\_\_\_
- Don't know/can't recall (15)

Did you go or look anywhere else for additional information? [check all that apply]

- Books (1)
- Brochures, pamphlets etc (2)
- Disease organization (3)
- Family (4)
- Friend/co-worker (5)
- Pharmacist (6)
- A different doctor of healthcare provider than the one who ordered the test (7)
- Internet (8)
- Library (9)
- Magazines (10)
- Newspapers (11)
- Telephone information number (12)
- Complementary, alternative or unconventional practitioner (13)
- Other (14) \_\_\_\_\_
- Don't know/can't recall (15)

Did you find the information you were seeking?

- Yes (1)
- No (2)
- Don't know/can't recall (3)
- Prefer not to answer (4)

If Yes Is Not Selected, Then Skip To End of Block

Thinking about your search for additional information about your medicine or the test result, how much do you agree or disagree with the following statements. Rank each on a scale from 1 to 5 where 1 is strongly disagree and 5 is strongly agree.

|                                                               | 1<br>(Strongly disagree)<br>(1) | 2<br>(2)              | 3<br>(3)              | 4<br>(4)              | 5<br>(Strongly agree)<br>(5) |
|---------------------------------------------------------------|---------------------------------|-----------------------|-----------------------|-----------------------|------------------------------|
| It took a lot of effort to get the information you needed (1) | <input type="radio"/>           | <input type="radio"/> | <input type="radio"/> | <input type="radio"/> | <input type="radio"/>        |
| You felt frustrated during your search for information (2)    | <input type="radio"/>           | <input type="radio"/> | <input type="radio"/> | <input type="radio"/> | <input type="radio"/>        |
| You were concerned about the quality of the information (3)   | <input type="radio"/>           | <input type="radio"/> | <input type="radio"/> | <input type="radio"/> | <input type="radio"/>        |
| The information you found was hard to understand (4)          | <input type="radio"/>           | <input type="radio"/> | <input type="radio"/> | <input type="radio"/> | <input type="radio"/>        |

Sometimes the same genes are involved in how your body responds to different drugs. Therefore, your test results may be important for other medications prescribed to you in the future. How likely would you be to share these results with other doctors that prescribe medications for you?

- Very likely (1)
- Somewhat likely (2)
- Unsure (3)
- Not very likely (4)
- Not at all likely (5)
- Prefer not to answer (6)

How likely would you be to share the test result with your pharmacist so that s/he can check whether other drugs you are currently taking or will take in the future should be adjusted based on the results?

- Very likely (1)
- Somewhat likely (2)
- Unsure (3)
- Not very likely (4)
- Not at all likely (5)
- Prefer not to answer (6)

Did you discuss the results of the pharmacogenetic test you had about 3 months ago with anyone? If yes, with whom did you share the results? [check all that apply]

- I have not shared my test results with anyone at this time (1)
- Your spouse/partner (2)
- Your child/children (3)
- Other family members (sister, parent, grandparent, aunt/uncle, cousin, etc) (4)
- A close friend (5)
- A co-worker (6)
- Your boss (7)
- A doctor or healthcare provider other than the one who ordered the test (8)
- Your pharmacist (9)
- A church leader (minister, deacon, priest, etc) (10)
- Other (11) \_\_\_\_\_

On a scale from 1-5, indicate how much you agree or disagree with each statement, where 1 = strongly disagree, 2 = disagree, 3 = uncertain, 4 = agree, and 5 = strongly agree

|                                                                                            | 1<br>(Strongly disagree)<br>(1) | 2<br>(Disagree)<br>(2) | 3<br>(Uncertain)<br>(3) | 4<br>(Agree)<br>(4)   | 5<br>(Strongly Agree)<br>(5) |
|--------------------------------------------------------------------------------------------|---------------------------------|------------------------|-------------------------|-----------------------|------------------------------|
| My health, at present, depends on my medicines (1)                                         | <input type="radio"/>           | <input type="radio"/>  | <input type="radio"/>   | <input type="radio"/> | <input type="radio"/>        |
| Having to take medicines worries me (2)                                                    | <input type="radio"/>           | <input type="radio"/>  | <input type="radio"/>   | <input type="radio"/> | <input type="radio"/>        |
| My life would be impossible without my medicines (3)                                       | <input type="radio"/>           | <input type="radio"/>  | <input type="radio"/>   | <input type="radio"/> | <input type="radio"/>        |
| Without my medicines, I would be very ill (4)                                              | <input type="radio"/>           | <input type="radio"/>  | <input type="radio"/>   | <input type="radio"/> | <input type="radio"/>        |
| I sometimes worry about the long-term effects of my medicines (5)                          | <input type="radio"/>           | <input type="radio"/>  | <input type="radio"/>   | <input type="radio"/> | <input type="radio"/>        |
| My medicines are a mystery to me (6)                                                       | <input type="radio"/>           | <input type="radio"/>  | <input type="radio"/>   | <input type="radio"/> | <input type="radio"/>        |
| My health and future will depend on my medicines (7)                                       | <input type="radio"/>           | <input type="radio"/>  | <input type="radio"/>   | <input type="radio"/> | <input type="radio"/>        |
| My medicines disrupt my life (8)                                                           | <input type="radio"/>           | <input type="radio"/>  | <input type="radio"/>   | <input type="radio"/> | <input type="radio"/>        |
| I sometimes worry about becoming to dependent on my medicines (9)                          | <input type="radio"/>           | <input type="radio"/>  | <input type="radio"/>   | <input type="radio"/> | <input type="radio"/>        |
| My medicines protect me from becoming worse (10)                                           | <input type="radio"/>           | <input type="radio"/>  | <input type="radio"/>   | <input type="radio"/> | <input type="radio"/>        |
| Doctors use too many medicines (11)                                                        | <input type="radio"/>           | <input type="radio"/>  | <input type="radio"/>   | <input type="radio"/> | <input type="radio"/>        |
| People who take medicines should stop their treatment for a while every now and again (12) | <input type="radio"/>           | <input type="radio"/>  | <input type="radio"/>   | <input type="radio"/> | <input type="radio"/>        |
| Most medicines are addictive (13)                                                          | <input type="radio"/>           | <input type="radio"/>  | <input type="radio"/>   | <input type="radio"/> | <input type="radio"/>        |
| Natural remedies are safer than medicines (14)                                             | <input type="radio"/>           | <input type="radio"/>  | <input type="radio"/>   | <input type="radio"/> | <input type="radio"/>        |
| Medicines do more harm than good (15)                                                      | <input type="radio"/>           | <input type="radio"/>  | <input type="radio"/>   | <input type="radio"/> | <input type="radio"/>        |
| All medicines are poisons (16)                                                             | <input type="radio"/>           | <input type="radio"/>  | <input type="radio"/>   | <input type="radio"/> | <input type="radio"/>        |
| Doctors place too much trust on medicines (17)                                             | <input type="radio"/>           | <input type="radio"/>  | <input type="radio"/>   | <input type="radio"/> | <input type="radio"/>        |
| If doctors had more time with patients they would prescribe fewer medicines (18)           | <input type="radio"/>           | <input type="radio"/>  | <input type="radio"/>   | <input type="radio"/> | <input type="radio"/>        |

Q52

|                                                                                                                                                                              | Yes<br>(1)            | No<br>(2)             |
|------------------------------------------------------------------------------------------------------------------------------------------------------------------------------|-----------------------|-----------------------|
| Do you sometimes forget to take your medicine? (1)                                                                                                                           | <input type="radio"/> | <input type="radio"/> |
| People sometimes miss taking their medicines for reasons other than forgetting. Thinking over the past 2 weeks, were there any days when you did not take your medicine? (2) | <input type="radio"/> | <input type="radio"/> |
| Have you ever cut back or stopped taking your medicine without telling your doctor because you felt worse when you took it? (3)                                              | <input type="radio"/> | <input type="radio"/> |
| When you travel or leave home, do you sometimes forget to bring along your medicine? (4)                                                                                     | <input type="radio"/> | <input type="radio"/> |
| Did you take all your medicines yesterday? (5)                                                                                                                               | <input type="radio"/> | <input type="radio"/> |
| When you feel like your symptoms are under control, do you sometimes stop taking your medicine? (6)                                                                          | <input type="radio"/> | <input type="radio"/> |
| Taking medicine every day is a real inconvenience for some people. Do you ever feel hassled about sticking to your treatment plan? (7)                                       | <input type="radio"/> | <input type="radio"/> |

How often do you have difficulty remember to take all your medicine?

- Never/rarely (1)
- Once in a while (2)
- Sometimes (3)
- Usually (4)
- All the time (5)

How would you describe your understanding of how genetic testing can be used in healthcare?  
Would you say you understand it

- Very well (1)
- Somewhat well (2)
- A little (3)
- Not at all (4)

How much do you think your genes contribute to how you respond to a prescribed medication?

- A lot (1)
- Somewhat (2)
- A little (3)
- None at all (4)
- Don't know (5)

For the next series of questions, please tell how often you've experienced these things in the past week.

|                                                                                                                                                        | Never<br>(1)          | Rarely<br>(2)         | Sometimes<br>(3)      | Often<br>(4)          |
|--------------------------------------------------------------------------------------------------------------------------------------------------------|-----------------------|-----------------------|-----------------------|-----------------------|
| Felt upset about my test result (1)                                                                                                                    | <input type="radio"/> | <input type="radio"/> | <input type="radio"/> | <input type="radio"/> |
| Felt anxious or nervous about my test result (2)                                                                                                       | <input type="radio"/> | <input type="radio"/> | <input type="radio"/> | <input type="radio"/> |
| Felt guilty about my test result (3)                                                                                                                   | <input type="radio"/> | <input type="radio"/> | <input type="radio"/> | <input type="radio"/> |
| Felt relieved about my test result (4)                                                                                                                 | <input type="radio"/> | <input type="radio"/> | <input type="radio"/> | <input type="radio"/> |
| Felt happy about my test result (5)                                                                                                                    | <input type="radio"/> | <input type="radio"/> | <input type="radio"/> | <input type="radio"/> |
| Felt a loss of control (6)                                                                                                                             | <input type="radio"/> | <input type="radio"/> | <input type="radio"/> | <input type="radio"/> |
| Had problems enjoying life because of my test result (7)                                                                                               | <input type="radio"/> | <input type="radio"/> | <input type="radio"/> | <input type="radio"/> |
| Worried about my risk of a side effect or not responding to the prescribed medication (8)                                                              | <input type="radio"/> | <input type="radio"/> | <input type="radio"/> | <input type="radio"/> |
| Was uncertain about what my test result means about my risk of having a side effect or not responding to the prescribed medication (9)                 | <input type="radio"/> | <input type="radio"/> | <input type="radio"/> | <input type="radio"/> |
| Was uncertain about what my test result means for my child(ren) and/or family's risk of a side effect or not responding to particular medications (10) | <input type="radio"/> | <input type="radio"/> | <input type="radio"/> | <input type="radio"/> |
| Thinking about my test results affected my work or family life (11)                                                                                    | <input type="radio"/> | <input type="radio"/> | <input type="radio"/> | <input type="radio"/> |
| Felt concerned about how my test results would affect my insurance status (12)                                                                         | <input type="radio"/> | <input type="radio"/> | <input type="radio"/> | <input type="radio"/> |
| Had difficulty talking about my test results with family members (13)                                                                                  | <input type="radio"/> | <input type="radio"/> | <input type="radio"/> | <input type="radio"/> |
| Felt regret about getting my test results (14)                                                                                                         | <input type="radio"/> | <input type="radio"/> | <input type="radio"/> | <input type="radio"/> |
| Worried about the possibility of my children being at risk for side effects or not responding to certain medications (15)                              | <input type="radio"/> | <input type="radio"/> | <input type="radio"/> | <input type="radio"/> |

## PGx Pre-study Physician Survey

In what year did you graduate from medical/PA school?

- Before 1980 (1)
- 1981-1990 (2)
- 1991-2000 (3)
- After 2000 (4)
- Prefer not to answer (5)

What is the total number of years you have been in clinical practice (post-residency/fellowship)?

\_\_\_\_\_

*Genetic testing refers to a type of medical test where genes are used to diagnose or predict a disease or medical condition. Diagnostic testing: Testing to diagnose a genetic disorder or predict onset of a genetic disorder; may be performed in a symptomatic or asymptomatic individual. Examples include: Genetic testing for Marfan syndrome or Huntington disease. Susceptibility testing: Testing to determine likelihood of developing a common disease in the future; typically performed in asymptomatic individuals. Testing determines the presence of genetic variants that are associated with increased risk of disease onset, but are not diagnostic or absolutely predictive of the disease. Examples include: testing for Type 2 diabetes risk or the breast and ovarian cancer risk (BRCA1/2) genes.*

On average, how often do you order genetic diagnostic tests or genetic susceptibility tests?

- Never (1)
- 1-2 times a year (2)
- 3-10 times a year (3)
- 11-25 times a year (4)
- More than 25 times a year (5)
- Don't know (6)

On average, how often do you refer patients to a genetic specialist (e.g. a genetic counselor or a physician board-certified in medical genetics)?

- Never (1)
- 1-2 times a year (2)
- 3-10 times a year (3)
- 11-25 times a year (4)
- More than 25 times a year (5)
- Don't know (6)



For the following questions, please indicate your level of agreement with each statement:

|                                                                                                                                    | Strongly agree (1)    | Somewhat agree (2)    | Neutral (3)           | Somewhat disagree (4) | Strongly Disagree (5) | Prefer not to answer (6) |
|------------------------------------------------------------------------------------------------------------------------------------|-----------------------|-----------------------|-----------------------|-----------------------|-----------------------|--------------------------|
| I feel well-informed about genetic testing in general (1)                                                                          | <input type="radio"/>    |
| I (would) feel comfortable discussing genetic testing for disease diagnosis/susceptibility with a patient (2)                      | <input type="radio"/>    |
| I (would) feel comfortable ordering a genetic diagnostic test or genetic susceptibility test for a patient (3)                     | <input type="radio"/>    |
| I (would) feel comfortable interpreting and discussing genetic testing results for disease diagnosis/prediction with a patient (4) | <input type="radio"/>    |

Pharmacogenetic (PGx) testing identifies genetic variants associated with drug response such as an increased risk for an adverse drug reaction or low likelihood of responding to a drug. PGx test results are intended to help inform drug selection and/or help guide dosing decisions.

Are you familiar with PGx testing (prior to this study)?

- Yes (1)
- No (2)
- Prefer not to answer (3)

If No Is Selected, Then Skip To Click to write the question text

Please indicated where you learned about PGx and PGx testing

- Medical school course(s) (1)
- Professional meetings (2)
- Drug or laboratory representative (3)
- Peer-reviewed publications/journals (4)
- CME learning (5)
- Just-in-time (point-of-care, reminder notice) (6)
- Grand rounds or other in-house seminars (7)
- Other (8) \_\_\_\_\_
- Prefer not to answer (9)

On average, how often do you order PGx testing?

- Never (1)
- 1-2 times a year (2)
- 3-10 times a year (3)
- 11-25 times a year (4)
- More than 25 times a year (5)
- Don't know (6)

For the following questions, please indicate your level of agreement with each statement:

|                                                                                                                   | Strongly agree (1)    | Somewhat agree (2)    | Neutral (3)           | Somewhat disagree (4) | Strongly Disagree (5) | Prefer not to answer (6) |
|-------------------------------------------------------------------------------------------------------------------|-----------------------|-----------------------|-----------------------|-----------------------|-----------------------|--------------------------|
| I feel well-informed about PGx testing (1)                                                                        | <input type="radio"/>    |
| I (would) feel comfortable discussing PGx with a patient prior to ordering the test if I recommended the test (2) | <input type="radio"/>    |
| I would discuss the results of PGx testing with a patient prior to making any changes to their treatment (3)      | <input type="radio"/>    |
| I (would) feel comfortable discussing the results of PGx testing with a patient (4)                               | <input type="radio"/>    |
| I (would) feel comfortable using PGx testing to inform decisions regarding a given patient's treatment (5)        | <input type="radio"/>    |
| I believe most patients would be interested in having PGx testing if available (6)                                | <input type="radio"/>    |
| I believe PGx testing would improve patient compliance with drug regimen (7)                                      | <input type="radio"/>    |

*The next series of questions will assess knowledge about genomics and pharmacogenomics.*

Which of the following types of gene products may influence drug response or metabolism

- a. Drug transporter (1)
- b. Cytochrome P450 enzymes (2)
- c. Cell cycle genes (3)
- d. All of the above (4)
- e. Both A and B (5)

A single nucleotide polymorphism (SNP) is

- a. A combination of alleles closely linked in a single chromosome inherited together (1)
- b. A structural unit of DNA containing a sugar moiety, a phosphate group, and a base (2)
- c. A variation in the DNA sequence present in more than 1% of the population (3)
- d. The original or variant form of a gene at a particular location on a chromosome (4)
- e. None of the above (5)

All medications are metabolized through the Cytochrome P450 pathway

- True (1)
- False (2)

Up to \_\_\_\_% of drugs are estimated to be metabolized by proteins that are coded for by one of the three CYP genes (CYP2D6, CYP2C19, CYP2C9)

- 50 (1)
- 60 (2)
- 70 (3)
- 80 (4)
- 90 (5)

Patients who are identified by testing as poor metabolizers may be at risk for

- a. Drug induced side effects (1)
- b. Increased concentration of medication (2)
- c. Decreased potential for drug interactions (3)
- d. Both A and B (4)
- e. None of the above (5)

Patients who are identified by testing as ultra-rapid metabolizers may exhibit the following

- a. Lower than average rates of metabolism (1)
- b. Higher than average rates of metabolism (2)
- c. May require no dose adjustment (3)
- d. All of the above (4)
- e. None of the above (5)

JM is a 65 year-old woman who has recently been diagnosed with atrial fibrillation. To reduce the risk of stroke and other thrombotic events, JM's physician recommends warfarin therapy. To estimate the initial dose, JM's clinical characteristics (age, sex, weight, diet) were considered. However, JM will need to return to the clinic every day for INR monitoring until a stable dose is determined, and then every few weeks thereafter for maintenance monitoring. How could PGx testing for two genes (CYP2C9 and VKORC1) help JM?

- a. Determination of JM's CYP2C9 genotype would be of no help. (1)
- b. Determination of JM's VKORC1 genotype would reveal whether to increase or decrease the dose of warfarin needed to inhibit the formation of the clotting factor. (2)
- c. It would allow for more accurate initial dosing. (3)
- d. All of the above (4)
- e. B and C (5)

SH is a 30 year-old woman who gave birth by C-section 10 days ago. Her physician prescribed codeine for post-caesarian pain. Despite taking no more than the prescribed dose, SH experienced nausea and dizziness. She also noticed that her breastfed infant appeared lethargic and was feeding poorly. When SH mentioned these symptoms to her physician, he recommended that she discontinue codeine use. Within a few days, both SH's and her infant's symptoms were no longer present. How would PGx testing have helped SH and her infant?

- a. Genotyping of SH's CYP2D6 gene may have revealed that she is an ultra-rapid metabolizer; so her physician could prescribe another drug to prevent infant opioid toxicity. (1)
- b. Genotyping of SH's CYP2D6 gene may have revealed the possible genotype of her infant; so her physician could prescribe another drug to prevent opioid toxicity. (2)
- c. SH would not benefit from genetic testing because it was a drug allergy. (3)
- d. All of the above (4)
- e. none of the above (5)

What factors would increase your likelihood of ordering PGx testing routinely? Please indicate the level of importance each factor by ranking them 1 (most important) to 6 (least important). To do this, click and drag the blocks to the right of each factor to move them into the order of importance.

- \_\_\_\_\_ Clinical guidelines (1)
- \_\_\_\_\_ Insurance reimbursement (2)
- \_\_\_\_\_ Cost of the test (3)
- \_\_\_\_\_ Urgency of treatment (4)
- \_\_\_\_\_ Turn around time for test results (5)
- \_\_\_\_\_ Patient request (6)

To what degree do you believe that clinical pharmacists will play a role in delivery of PGx tests in clinical care?

- None (1)
- A little (2)
- Some (3)
- A Lot (4)
- Prefer not to answer (5)

To what degree do you believe that clinical geneticists/genetic counselors will play a role in delivery of PGx tests in clinical care?

- None (1)
- A little (2)
- Some (3)
- A Lot (4)
- Prefer not to answer (5)

If a medication that is the recommended first-line treatment has been found to be affected by a pharmacogenetic variant, would you choose to prescribe an alternative medication if available to avoid the need for testing?

- Yes (1)
- No (2)
- Prefer not to answer (3)

Would you be more likely to order a PGx test if the patient was on numerous medications?

- Yes (1)
- No (2)
- Prefer not to answer (3)

Would having assistance in evaluating a PGx test result (analogous to a radiologist's report) increase your likelihood of ordering a PGx test?

- Yes (1)
- No (2)
- Prefer not to answer (3)

Which health professional should communicate PGx test results to the patient?

- Physician who ordered test (1)
- Genetic counselor/geneticist (2)
- Pharmacist (3)
- Any of the above (4)
- No need to communicate results to the patient (5)
- Prefer not to answer (6)

In your opinion, what is the best way to educate primary care practitioners about PGx testing?

- Coursework/curricula (medical school) (1)
- Professional meetings (2)
- Drug or laboratory representative (3)
- Peer-reviewed publications/journals (4)
- Distance learning (mail or web-based) (5)
- Just-in-time (point-of-care, reminder notice) (6)
- Grand rounds of other types of in-house seminars (7)
- Other (8) \_\_\_\_\_
- Pharmacogenetics (PGx) education is not necessary for primary car practitioners (9)
- Prefer not to answer (10)

The Genetic Non-Discrimination Act (GINA) protects patients from discriminatory use of genetic information by which group (s)?

- a. Health insurers (1)
- b. Life insurers (2)
- c. Employers (3)
- d. All of the above (4)
- e. A and C (5)

Thank you for completing the survey. Please proceed to complete information needed to receive your reimbursement of \$100. You will be taken to a separate questionnaire that is not linked to this survey.

## PGx Post-Study Physician Survey

Q1 Thank you for participating in the Pharmacogenetics in Primary Care Study. We invite you to share your experiences and opinions about PGx testing now that the study has ended. The goal of the post-intervention survey is to assess your knowledge of PGx testing, attitudes toward testing and delivery models, perceived value of testing, and potential patient harms or problems related to the future delivery of testing. As with the pre-trial survey, you will receive an honorarium of \$100 for your time.

For the following question, please indicate your level of agreement with the statement based on your experience in the study: I felt that the 60 minute CME on PGx was informative and provided me with the necessary information to offer PGx testing to my patients and use the results appropriately

- Strongly agree (1)
- Somewhat agree (2)
- Neutral (3)
- Somewhat disagree (4)
- Strongly disagree (5)
- Prefer not to answer (6)

Please indicate how the CME seminar could have been improved to better prepare you to offer PGx testing

- The CME seminar covered too many topics (would recommend more time devoted to fewer topics) (1)
- The CME seminar covered too few topics and did not provide sufficient information (would recommend more topics to provide more comprehensive overview) (2)
- The CME seminar did not focus enough on PGx testing (would recommend less background information about genetics and genomics) (3)
- The examples presented were too simplistic and not characteristic of real world setting (would recommend including more examples representative of those encountered in primary care setting) (4)
- I felt the CME seminar was satisfactory (5)
- Other (6) \_\_\_\_\_

Did you order any PGx tests during the 6-month study period?

- Yes (1)
- No (2)
- Don't recall (3)



Please answer the following questions based on your experience in the study:

|                                                                                                                                               | Strongly agree (1)    | Somewhat agree (2)    | Neutral (3)           | Somewhat disagree (4) | Strongly disagree (5) |
|-----------------------------------------------------------------------------------------------------------------------------------------------|-----------------------|-----------------------|-----------------------|-----------------------|-----------------------|
| Due to my participation in the study, I feel more informed about PGx testing. (1)                                                             | <input type="radio"/> |
| Due to my participation in the study, I feel comfortable discussing PGx testing with a patient prior to ordering testing (2)                  | <input type="radio"/> |
| Due to my participation in the study, I feel comfortable using PGx test results to inform decisions regarding a given patient's treatment (3) | <input type="radio"/> |
| Due to my participation in this study, I feel comfortable discussing PGx test results with my patients. (4)                                   | <input type="radio"/> |

Did you review PGx test results with patients?

- Yes, I reviewed PGx test results with all patients for which PGx testing was ordered (1)
- Yes, I reviewed PGx test results for only patients for which the test result affected the original dose or drug choice (2)
- No, I did not review PGx test results with any patients for which PGx testing was ordered (3)
- Prefer not to answer (4)

If No, I did not review PGx te... Is Selected, Then Skip To Please indicate your level of agreeme...

How did you inform patients about their results?

- Discussed results at a follow-up visit (1)
- Discussed results at their next scheduled visit (2)
- Mailed results to patients (3)
- Reported results over the phone (4)
- I did not inform patients of their results (5)
- Other (6) \_\_\_\_\_
- Prefer not to answer (7)

Please indicate your level of agreement with the following statement:

I was able to answer most questions my patients had about PGx testing and their results.

- Strongly agree (1)
- Somewhat agree (2)
- Neutral (3)
- Somewhat disagree (4)
- Strongly disagree (5)
- Prefer not to answer (6)

Please indicate your level of agreement with each statement regarding the PGx test lab report

|                                                                                                                                               | Strongly agree (1)    | Somewhat agree (2)    | Neutral (3)           | Somewhat disagree (4) | Strongly disagree (5) | Prefer not to answer (6) |
|-----------------------------------------------------------------------------------------------------------------------------------------------|-----------------------|-----------------------|-----------------------|-----------------------|-----------------------|--------------------------|
| In general, the PGx lab report provided helpful information about drug dosing/selection adjustments based on patient's genotype/phenotype (1) | <input type="radio"/>    |
| The lab report included too much text/information (2)                                                                                         | <input type="radio"/>    |
| The lab report provided information that was not pertinent/extraneous (3)                                                                     | <input type="radio"/>    |
| The lab report did not provide any good additional resources to consult (4)                                                                   | <input type="radio"/>    |

Did you provide the patient educational brochure to patients whom testing was offered?

- No, I did not give the brochure to any patients with whom I discussed PGx testing (1)
- No, I did not give the brochure but provided other resources to patients with whom I discussed PGx testing (2)
- No, I was unaware of the brochure (3)
- Yes, I gave the brochure to some patients with whom I discussed PGx testing (4)
- Yes, I gave the brochure to all patients with whom I discussed PGx testing (5)
- Prefer not to answer (6)
- Don't recall (7)

Did you provide the drug-specific insert to patients with whom PGx testing was offered?

- No, I did not give the drug-specific inserts to any patients with whom I discussed PGx testing (1)
- No, I did not give the drug-specific inserts but provided other resources for patients with whom I discussed PGx testing (2)
- No, I was unaware of the drug-specific inserts (3)
- Yes, I gave the drug-specific insert to some patients with whom I discussed PGx testing (4)
- Yes, I gave the drug-specific insert to all patients with whom I discussed PGx testing (5)
- Prefer not to answer (6)
- Don't recall (7)

Please indicate your level of agreement with the following statement: I believe the patient educational brochure explained PGx testing satisfactorily

- Strongly agree (1)
- Somewhat agree (2)
- Neutral (3)
- Somewhat disagree (4)
- Strongly disagree (5)
- Prefer not to answer (6)
- Don't know (7)

Did you consult with the pharmacist regarding PGx testing for any patients for whom testing was considered or ordered (either pre-testing or post-testing)?

- Yes (1)
- No (2)
- Don't recall (3)
- Did not know there was a pharmacist available to consult (4)

If Yes Is Selected, Then Skip To Regardless of whether you consulted t...

If you did not consult the pharmacist regarding PGx testing, for which of the following reasons did you not (check all that apply)?

- Did not need pharmacist input (1)
- Did not have time (2)
- Pharmacist was unavailable (3)
- Was unclear how pharmacist could assist me (4)
- Did not know there was a pharmacist available to consult (5)
- Other (6) \_\_\_\_\_

Regardless of whether you consulted the pharmacist or not, please indicate your level of agreement with the following statement: I believe that having a pharmacist available to consult can be helpful in interpreting and applying the PGx test results.

- Strongly agree (1)
- Somewhat agree (2)
- Neutral (3)
- Somewhat disagree (4)
- Strongly disagree (5)
- Prefer not to answer (6)

Please indicate how the pharmacist could have been more useful to you as a clinical educational resource

- I would have liked if the pharmacist could have met with my patients (1)
- I would have liked to have more learning opportunities with the pharmacist focusing on PGx (2)
- I would have liked for the pharmacist to have provided a written summary to mail to my patients (3)
- Pharmacist was useful and no changes recommended (4)
- Other (5) \_\_\_\_\_

Please indicate your level of agreement with the following statement: I believe PGx testing will become standard of care in the future

- Strongly agree (1)
- Somewhat agree (2)
- Neutral (3)
- Somewhat disagree (4)
- Strongly disagree (5)
- Prefer not to answer (6)

Please indicate your level of agreement with the following statement: I believe that PGx testing should be ordered prior to prescribing a medication for which PGx information has been included on the drug package insert

- Strongly agree (1)
- Somewhat agree (2)
- Neutral (3)
- Somewhat disagree (4)
- Strongly disagree (5)
- Prefer not to answer (6)

In general, how useful did you find PGx testing to be in informing drug dosing or selection?

- Very useful (1)
- Somewhat Useful (2)
- Neutral (3)
- Not very useful (4)
- Not at all useful (5)
- Prefer not to answer (6)

Would you choose to prescribe an alternative medication if a recommended medication you are considering has a PGx component?

- Yes (1)
- No (2)
- Prefer not to answer (3)

Would you be more likely to order a PGx test for a patient who was on multiple medications?

- Yes (1)
- No (2)
- Prefer not to answer (3)

How likely will you be to continue ordering PGx testing after the completion of this study?

- Not at all likely (1)
- Not very likely (2)
- Undecided (3)
- Somewhat Likely (4)
- Very Likely (5)
- Prefer not to answer (6)

Please indicate any challenges you experienced in ordering PGx testing (please check all that apply)

- There was insufficient time during office visit to discuss PGx testing with patient (1)
- Patients needed to be contacted to return to provide a saliva sample for testing (2)
- Sample collection is time consuming (3)
- Turnaround time to receive test results was too long (4)
- Receiving results via fax made incorporation into patient records timely and complicated (5)
- Explaining the test and collection process to the patient was difficult (6)
- Providing the results to patients was difficult (8)
- Other (9) \_\_\_\_\_

What factors would increase your likelihood of ordering PGx testing? Please indicate the level of importance of each factor where 1 is most important and 6 is least important:(For this question, click and drag the response to the order. For example, if you think "Urgency of treatment" is most important, click and drag to the top of the list where "Clinical Guidelines" is located)

- \_\_\_\_\_ Clinical Guidelines (1)
- \_\_\_\_\_ Insurance reimbursement (2)
- \_\_\_\_\_ Cost of the test (3)
- \_\_\_\_\_ Urgency of treatment (4)
- \_\_\_\_\_ Turn-around time on test results (5)
- \_\_\_\_\_ Patient request (6)

Which of the following types of gene products may influence drug response or metabolism?

- A. Drug transporter (1)
- B. Cytochrome P450 enzymes (2)
- C. Cell cycle genes (3)
- D. All of the above (4)
- E. Both A and B (5)

The Genetic Non-Discrimination Act (GINA) protects patients from discriminatory use of genetic information by which group (s)?

- A. Health insurers (1)
- B. Life insurers (2)
- C. Employers (3)
- D. All of the above (4)
- E. Both A and C (5)

All medications are metabolized through the Cytochrome P 450 pathway.

- True (1)
- False (2)

A single nucleotide polymorphism (SNP) is:

- A. A combination of alleles closely linked in single chromosome inherited together. (1)
- B. A structural unit of DNA containing a sugar moiety, a phosphate group, and a base. (2)
- C. A variation in the DNA sequence present in more than 1% of the population. (3)
- D. The original or variant form of a gene at a particular location on a chromosome. (4)
- E. None of the above (5)

Up to \_\_\_\_\_% of drugs are estimated to be metabolized by proteins that are coded for one of the three CYP genes (CYP2D6, CYP2C19, CYP2C9).

- 20 (1)
- 40 (2)
- 60 (3)
- 80 (4)
- 100 (5)

Patients who are identified by testing as poor metabolizers may be at risk for:

- A. Increased concentration of medication (1)
- B. Drug induced side effects (2)
- C. Decreased potential for drug interactions. (3)
- D. Both A and B (4)
- E. None of the above (5)

Patients who are identified by testing as ultra rapid metabolizers may exhibit the following:

- Higher than average rates of metabolism (1)
- Lower than average rates of metabolism (2)
- May require no dose adjustment (3)
- All of the above (4)
- None of the above (5)

JM is a 65 year-old man who has recently been diagnosed with atrial fibrillation. To reduce the risk of stroke and other thrombotic events, JM's physician recommends Coumadin® therapy. To estimate the initial dose, JM's clinical characteristics (age, sex, weight, diet) were considered. How could PGx testing for two genes (CYP2C9 and VKORC1) help JM reach a stable dose more quickly?

- A. Allows for more accurate initial dosing. (1)
- B. Determination of JM's CYP2C9 genotype would be of no help. (2)
- C. Determination of JM's VKORC1 genotype would reveal whether to increase or decrease the dose of Coumadin® needed to inhibit the formation of the clotting factor. (3)
- D. All of the above (4)
- E. Both A and C. (5)

SH is a 30 year-old woman who gave birth by C-section 10 days ago. Her physician prescribed codeine for post-caesarean pain. Despite taking no more than the prescribed dose, SH experienced nausea and dizziness. She also noticed that her breastfed infant appeared lethargic and was feeding poorly. When SH mentioned these symptoms to her physician, he recommended that she discontinue codeine use. Within a few days, both SH's and her infant's symptoms were no longer present. How would PGx testing have helped SH and her infant?

- A. Genotyping of SH's CYP2D6 gene may have revealed that SH is an ultra-rapid metabolizer; so her physician could prescribe another drug to prevent infant opioid toxicity. (1)
- B. SH would not benefit from genetic testing because it was a drug allergy. (2)
- C. Genotyping of SH's CYP2D6 gene may have revealed the possible genotype of her infant; so her physician could prescribe another drug to prevent infant opioid toxicity. (3)
- D. All of the above (4)
- E. None of the above (5)

To what degree do you believe clinical pharmacists will play a role in delivery of PGx tests in clinical care?

- None (1)
- A Little (2)
- Some (3)
- A Lot (4)
- Prefer not to answer (5)

To what degree do you believe clinical geneticists/genetic counselors will play a role in delivery of PGx tests in clinical care?

- None (1)
- A Little (2)
- Some (3)
- A Lot (4)
- Prefer not to answer (5)

Would having assistance in evaluating a PGx test result (analogous to a radiologist's report) increase your likelihood to order a PGx test?

- Yes (1)
- No (2)
- Prefer not to answer (3)

Several options have been proposed as to when PGx testing should be ordered with respect to initiation of treatment. This study provided testing at the point-of-care (when a prescription has been initiated). Others have suggested that PGx testing should be ordered in advance as a panel of genes known to impact many commonly prescribed medications (referred to as prospective or preemptive testing). Which approach would you support?

- Point-of-care testing (1)
- Prospective testing (2)
- Neither (3)
- Unsure (4)
- Prefer not to answer (5)

If preemptive testing is reimbursed by insurers, when do you think it should be ordered?

- At birth (1)
- Adolescence (2)
- Young adult (3)
- First time a medication is prescribed (regardless of age) (4)
- Not at all (5)
- Prefer not to answer (6)



For patients who have had one or more PGx tests, where do you think PGx test results should be stored?

- Patient pharmacy record (1)
- Patient medical record (2)
- Patient keeps results (3)
- Patient's pharmacy and medical records (4)
- All of the above (5)

Of the patients you discussed PGx testing with, would you say most

- Agreed to testing with few/no questions or concerns (1)
- Agreed to testing with some questions or concerns (2)
- Deferred testing option until they experienced an adverse event or non-response (3)
- Declined testing (4)
- Did not discuss PGx testing with any patients (5)

In your opinion, of the patients that agreed to have PGx testing, most agreed because:

- They wanted to avoid adverse responses (1)
- They wanted to avoid multiple trips to the pharmacy or doctor's office to get new prescriptions if original prescription did not work (2)
- Testing was free (3)
- You, their primary care physician, recommended it (4)
- Unsure (5)
- Other reasons (6) \_\_\_\_\_
- Did not have any patients to whom testing was offered or that agreed to testing (7)

Please report the occurrence of each patient outcome in response to the PGx testing

|                                                       | Did not occur at all  | Occurred in some patients | Occurred in all patients | Unsure                |
|-------------------------------------------------------|-----------------------|---------------------------|--------------------------|-----------------------|
| Increased patient anxiety regarding their medication  | <input type="radio"/> | <input type="radio"/>     | <input type="radio"/>    | <input type="radio"/> |
| Decreased patient anxiety regarding their medication  | <input type="radio"/> | <input type="radio"/>     | <input type="radio"/>    | <input type="radio"/> |
| Increased patient compliance                          | <input type="radio"/> | <input type="radio"/>     | <input type="radio"/>    | <input type="radio"/> |
| Decreased patient compliance                          | <input type="radio"/> | <input type="radio"/>     | <input type="radio"/>    | <input type="radio"/> |
| Increased patient confidence in effectiveness of drug | <input type="radio"/> | <input type="radio"/>     | <input type="radio"/>    | <input type="radio"/> |
| Decreased patient confidence in effectiveness of drug | <input type="radio"/> | <input type="radio"/>     | <input type="radio"/>    | <input type="radio"/> |
| Prescription cost increase                            | <input type="radio"/> | <input type="radio"/>     | <input type="radio"/>    | <input type="radio"/> |
| Prescription cost decrease                            | <input type="radio"/> | <input type="radio"/>     | <input type="radio"/>    | <input type="radio"/> |
| Increased patient confusion                           | <input type="radio"/> | <input type="radio"/>     | <input type="radio"/>    | <input type="radio"/> |
| Delay in treatment until test results returned        | <input type="radio"/> | <input type="radio"/>     | <input type="radio"/>    | <input type="radio"/> |
